# Supplementary material for: Synthesis and properties of mesoporous Zn-doped Li1.2Mn0.54Co0.13Ni0.13O2 as cathode materials by a MOFs-assisted solvothermal method
Source: Royal Society of Chemistry journal article supplement (doi:10.1039/c7ra05106a), 2017-01-01
Supplement: c7ra05106a1.pdf [file c7ra05106a1.pdf]

**Synthesis and properties of mesoporous Zn-doped  $\text{Li}_{1.2}\text{Mn}_{0.54}\text{Co}_{0.13}\text{Ni}_{0.13}\text{O}_2$  as cathode materials by MOFs-assisted solvothermal method**

**Xin Wei, Puheng Yang, Honglei Li, Shengbin Wang, Yalan Xing\*, Xin Liu, Shichao Zhang\***

School of Materials Science and Engineering, Beihang University, Beijing 100191,  
PR China

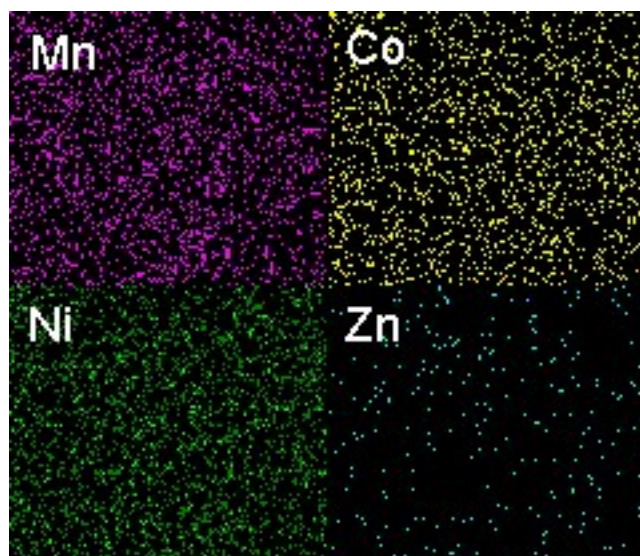

**Fig. S1** Elemental mappings of sample Z2.

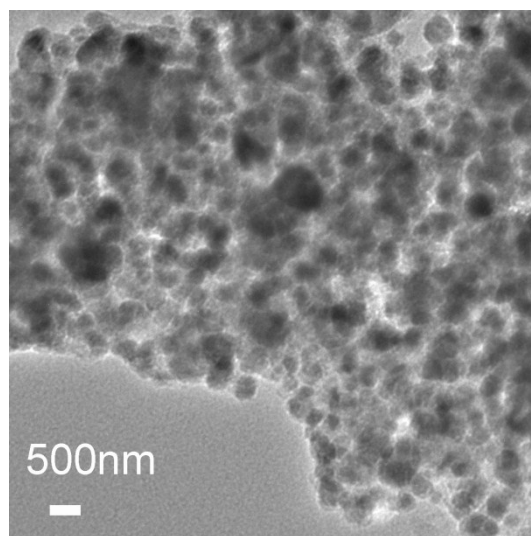

**Fig. S2** TEM image of sample Z2.
